# Supplementary material for: Gα13 negatively controls osteoclastogenesis through inhibition of the Akt-GSK3β-NFATc1 signalling pathway
Source: PubMed Central journal article supplement (PMC5253683; doi:10.1038/ncomms13700), 2017-01-19
Supplement: ncomms13700-s1.pdf [file ncomms13700-s1.pdf]

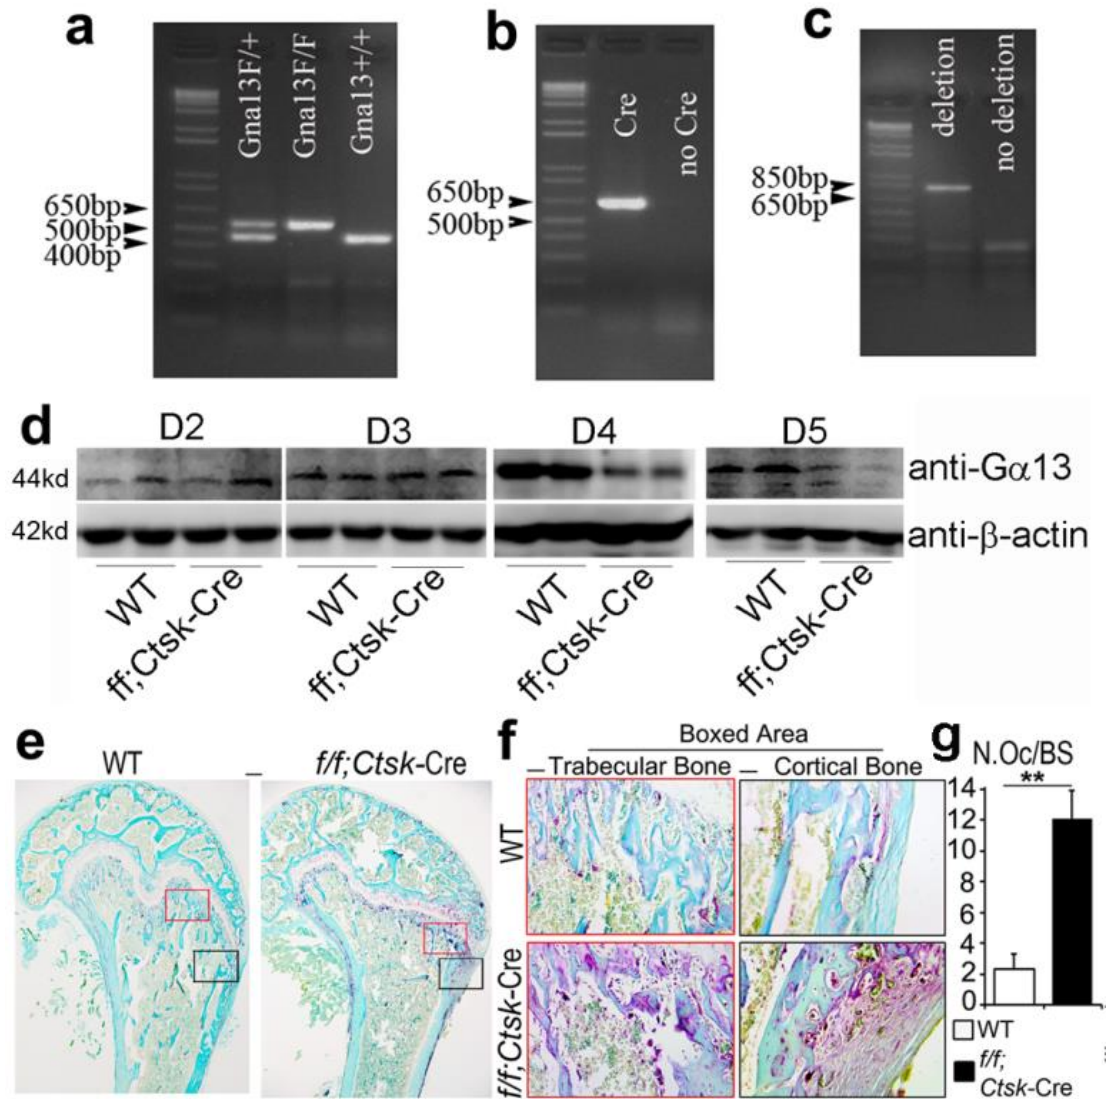

Supplementary Figure 1. Bone density was decreased in osteoclast-lineage cell specific *Gna13* deficient mice. (a-c) PCR genotyping of mice by mouse tail DNA. Primers were designed to detect *Gna13*-WT/*f* (~400bp/470bp) (a), *Gna13*-deletion (~800bp) (b) and *Cre* (~650bp) (c). (d) G $\alpha$ 13 protein levels in WT and *Gna13<sup>ff</sup>Ctsk-Cre* (*ff;Ctsk-Cre*) bone marrow cells; D#, # days under the treatment of RANKL and M-CSF. (e,f) TRAP staining of femurs from two-month-old WT and *Gna13<sup>ff</sup>Ctsk-Cre* female mice. (g) Quantification of osteoclast number in d. OcS/BS, osteoclast surface/bone surface. N.Oc/BS, osteoclast number/bone surface. Results were expressed as mean  $\pm$  standard deviation (SD), N=6; \*\*, p  $\leq$  0.01 (Student's T-test). scale bar in e, 200 $\mu$ m; scale bar in f, 20 $\mu$ m.

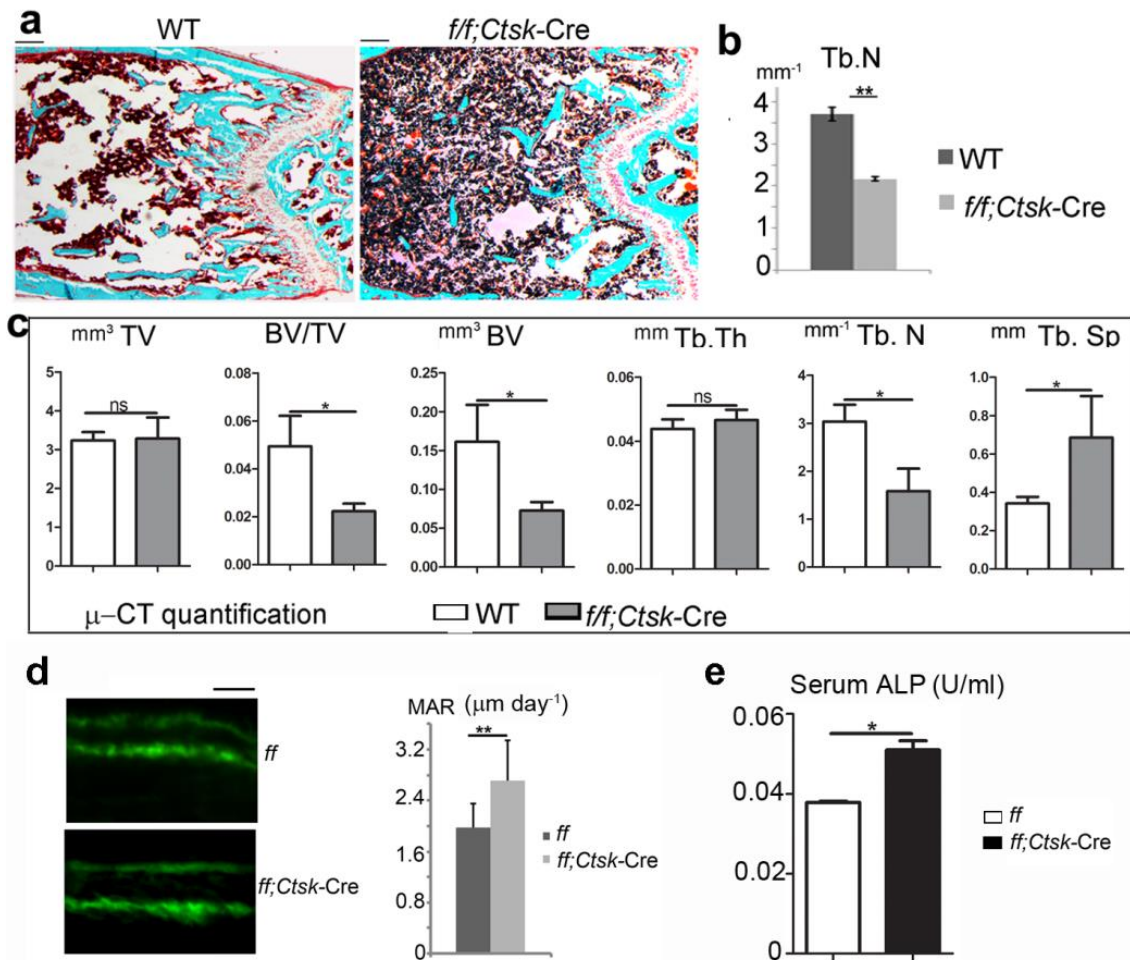

Supplementary Figure 2. Osteoclast number was increased in osteoclast-specific *Gna13*-deficient mice. (a) Trichrome staining of femurs from two-month-old female WT and *Gna13<sup>ff</sup>Ctsk-Cre* (*ff;Ctsk-Cre*) mice. (b) Histomorphometry quantification in a. ObS / BS, osteoblast surface / bone surface; N.Ob / BS, number of osteoblast / bone surface; Tb.N, trabecular bone number. (c) Quantification from  $\mu\text{-CT}$  in Fig. 2i; N=4 Tb.Th, trabecular bone thickness; Tb.N, trabecular bone number; Tb.Sp, trabecular bone space; BV, bone volume; TV, tissue volume. (d) Calcein labeling in the 2-month-old female calvariae assessed using undecalcified frozen sections, and its quantification (MAR, mineral apposition rate); N=20. (g) Elisa to detect serum Alkaline Phosphatase (ALP) in 2-month old WT and *Gna13<sup>ff</sup>Ctsk-Cre* female mice; N=4. Results were expressed as mean  $\pm$  standard deviation (SD), N=3; \*,  $p \leq 0.05$ ; \*\*,  $p \leq 0.01$ ; ns, not significant (Student's T-test). scale bar in a, 200 $\mu\text{m}$ ; scale bar in d, 20 $\mu\text{m}$ .

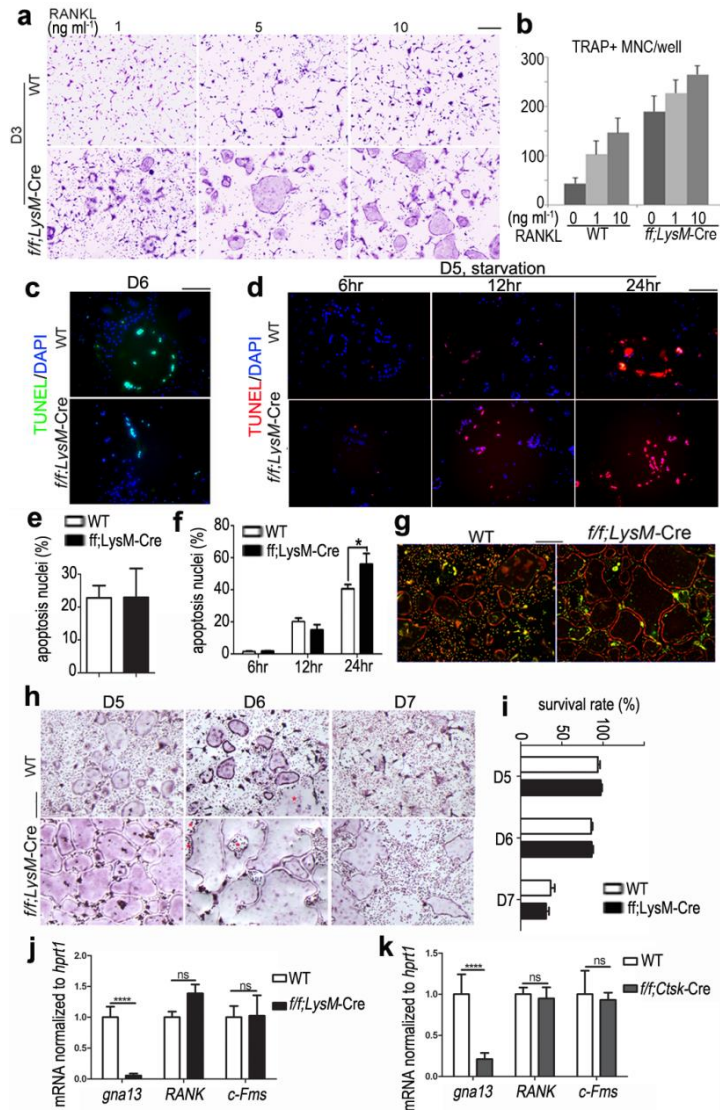

Supplementary Figure 3. Deletion of *Gna13* expression promotes osteoclast formation, but not survival and acidification.

(a) TRAP staining to detect osteoclast formation of WT and *Gna13<sup>ff</sup>LysM-Cre* (*ff;LysM-Cre*) bone marrow monocytes (BMMs) under the treatment of M-CSF and different doses of RANKL for 3 days (D3). (b) Quantification of TRAP+ MNC per well in a; N=4 (c) TUENL staining of D6 WT and *Gna13<sup>ff</sup>LysM-Cre* osteoclasts. (d) TUENL staining of D5 WT and *Gna13<sup>ff</sup>LysM-Cre* osteoclasts, serum and cytokine starved for 6, 12 and 24 hours (hr). (e,f) quantification of apoptosis rate in c (e) and d (f); N=4 (g) Acidification of osteoclasts by acidine orange staining. (h) TRAP staining of extensive cultured WT and *Gna13<sup>ff</sup>LysM-Cre* osteoclasts. (i) Quantification of survival rated in h; N=4. (j) qRT-PCR to detect *gna13*, *RANK* and *c-Fms* expression in D1 WT and *Gna13<sup>ff</sup>LysM-Cre* pre-osteoclasts; N=4. (k) qRT-PCR to detect *gna13*, *RANK* and *c-Fms* expression in D4 WT and *Gna13<sup>ff</sup>Ctsk-Cre* osteoclasts; N=4. Results were expressed as mean  $\pm$  standard deviation (SD); \*,  $p \leq 0.05$ ; \*\*,  $p \leq 0.01$ ; \*\*\*,  $p \leq 0.001$ ; \*\*\*\*,  $p \leq 0.0001$  (Student's T-test). scale bar in a,g,h 200 $\mu$ m; scale bar in c,d, 100 $\mu$ m.

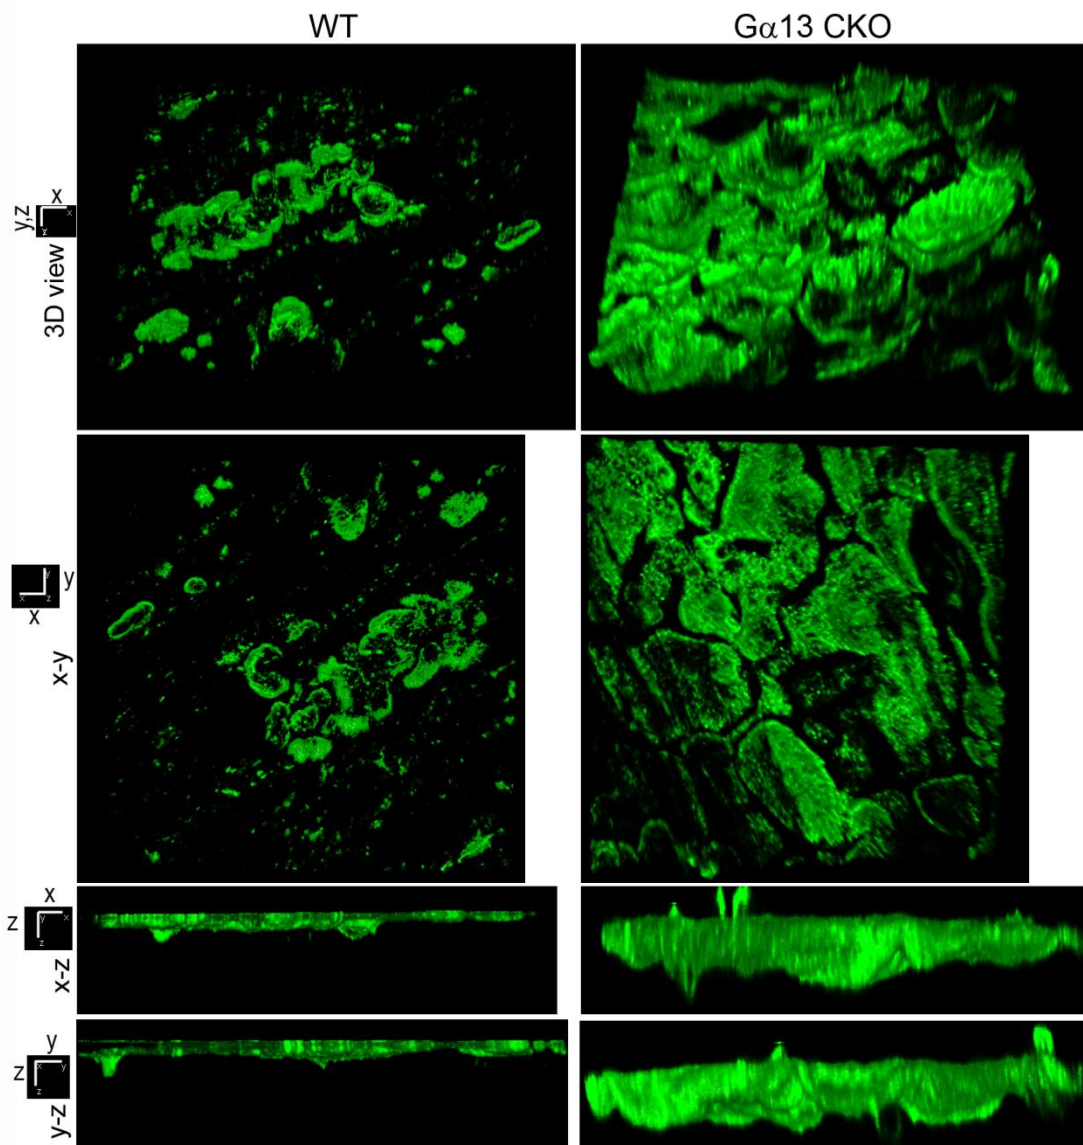

Supplementary Figure 4. Confocal microscopy of bone resorption pits resorbed by WT and *Gna13<sup>fl</sup>LysM-Cre* osteoclasts. scale bars: x, 0.13 $\mu$ m; y, 0.13 $\mu$ m; z, 0.45 $\mu$ m

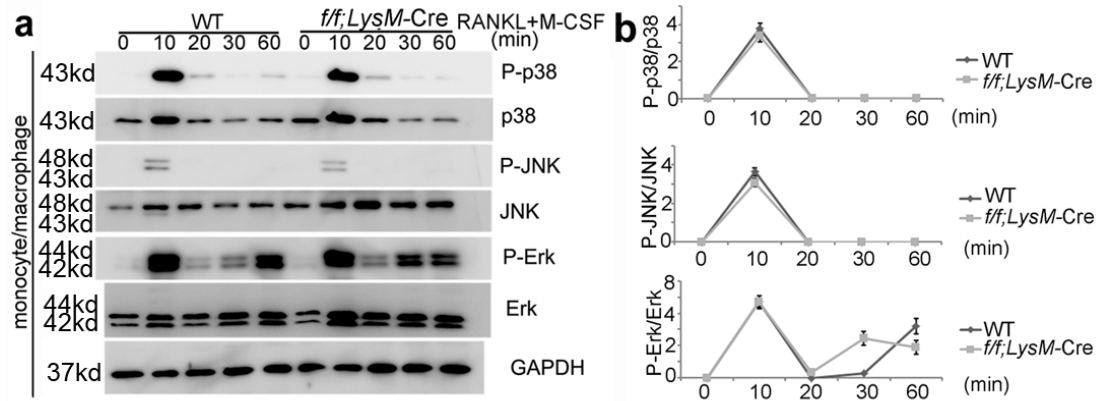

Supplementary Figure 5. p38, JNK and Erk phosphorylation is similar in WT and mutant cells. (a) Western blot analysis to detect phosphorylation signaling induced by RANKL and M-CSF in WT and *Gna13<sup>ff</sup>LysM-Cre* (*ff;LysM-Cre*) BMMs. (b) Quantification of a by ImageJ. Results were expressed as mean  $\pm$  standard deviation (SD),  $N \geq 3$ .

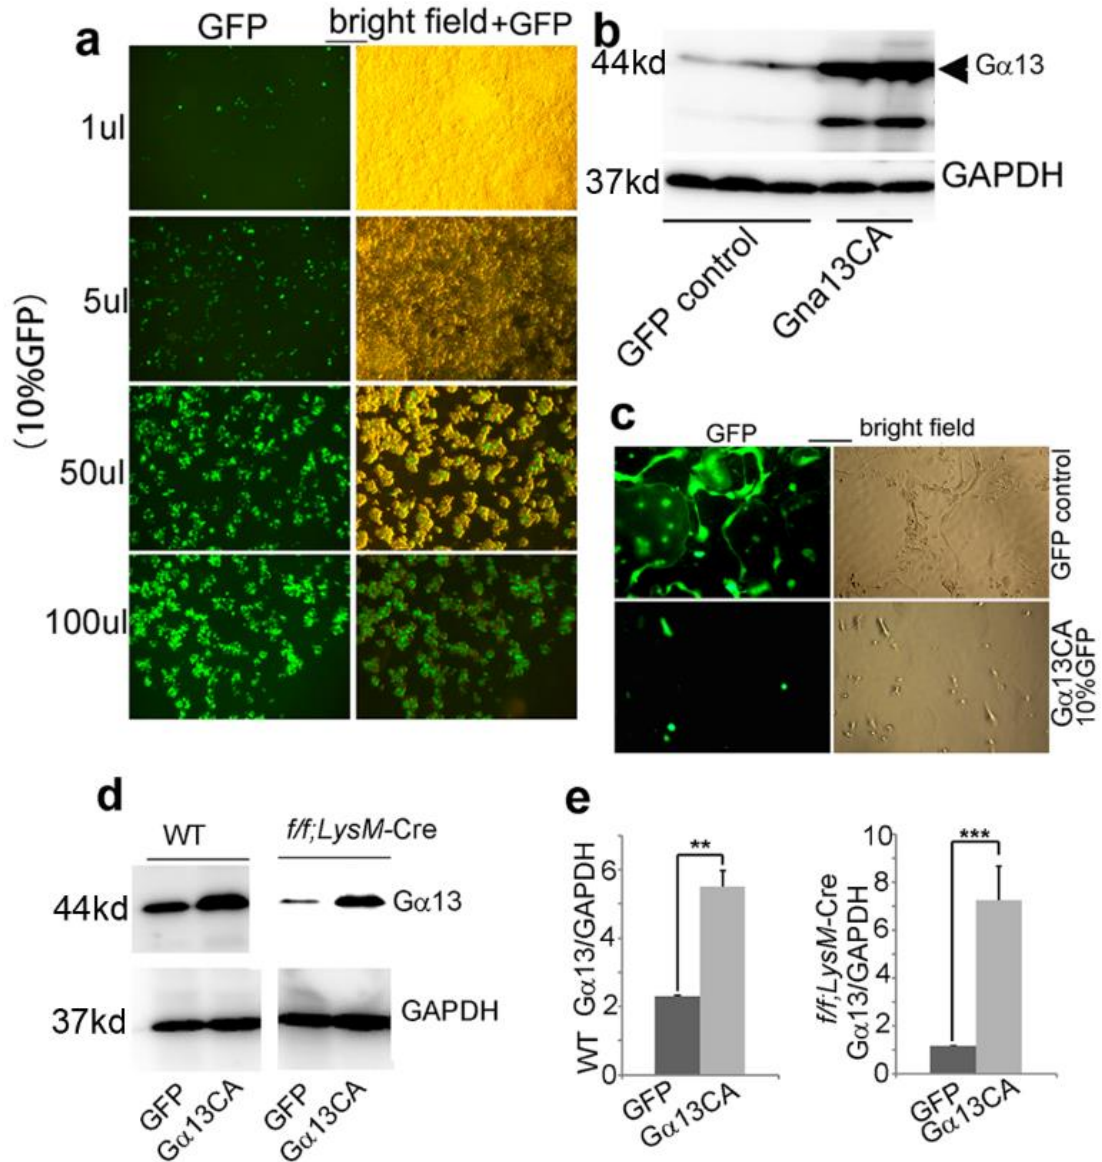

Supplementary Figure 6. Analysis of the titer and expression of Gα13 overexpression lentivirus.

(a) 293T was transfected with different volumes of Gα13 overexpressing lentivirus (containing 10% GFP expressing retrovirus), and GFP was observed 48 hours post-transfection. (b) Expression of Gα13 constitutive active form (Gα13CA) in 293T was confirmed by western blot. (c) Osteoclast precursors was transfected with GFP and Gα13CA overexpression lentivirus (the latter one contained 10% GFP expressing virus), and GFP was observed in mature cells. (d) WT and *Gna13*-deficient D1 pre-osteoclasts were transfected with GFP and Gα13CA overexpressing retrovirus and Gα13 expression was detected on Day 3 by western blot. (e) Quantification of d by ImageJ. Results were expressed as mean  $\pm$  standard deviation (SD),  $N \geq 3$ ; \*\*,  $p \leq 0.01$ ; \*\*\*,  $p \leq 0.001$  (Student's T-test). Scale bar, 100 $\mu$ m

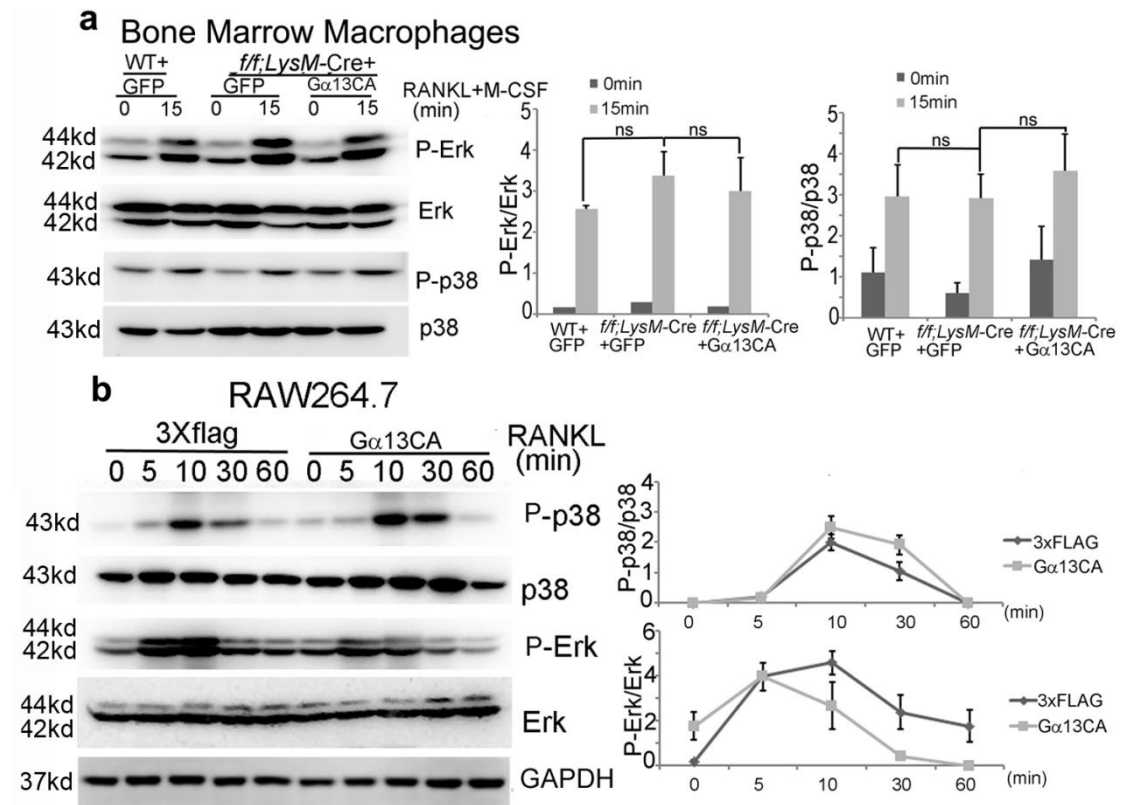

Supplementary Figure 7. Overexpression of *Gα13CA* does not affect p38 and Erk phosphorylation. (a) Western blot analysis to detect p38 and Erk phosphorylation induced by RANKL and M-CSF in WT and *Gna13<sup>fl/fl</sup>LysM-Cre* (*f/f;LysM-Cre*) osteoclasts (overexpressing GFP or *Gα13CA*). (b) Western blot analysis to detect RANKL induced p38 and Erk phosphorylation in RAW264.7 cells transfected with control retrovirus and retrovirus expressing *Gα13CA*. Quantification data were co-presented on the right panel. Results were expressed as mean  $\pm$  standard deviation (SD),  $N \geq 3$ ; ns, not significant (two-way ANOVA analysis).

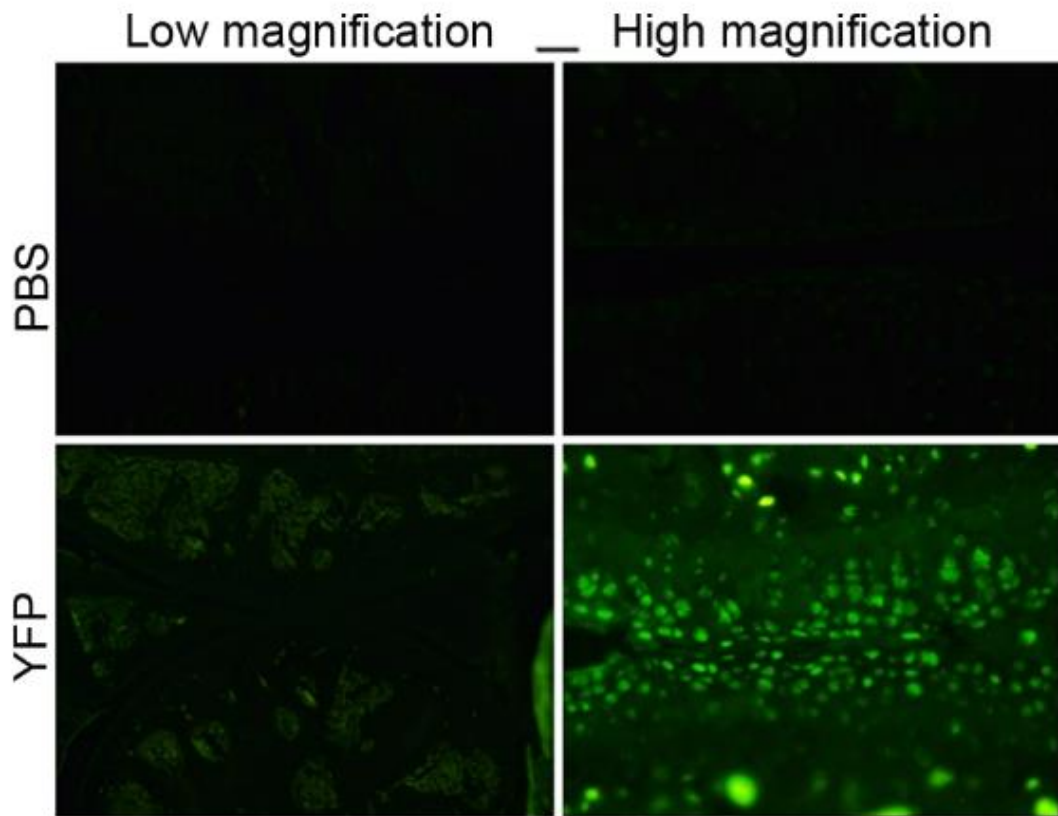

Supplementary Figure 8. Analysis of the effective infection of AAV in the knee joint. Upper panels, injection of PBS injection in knee Joint as control; Lower panels, injection of AAV-YFP in knee Joint, YFP expresses in the articular surface and Synovial cavity. Scale bar, 20 $\mu$ m



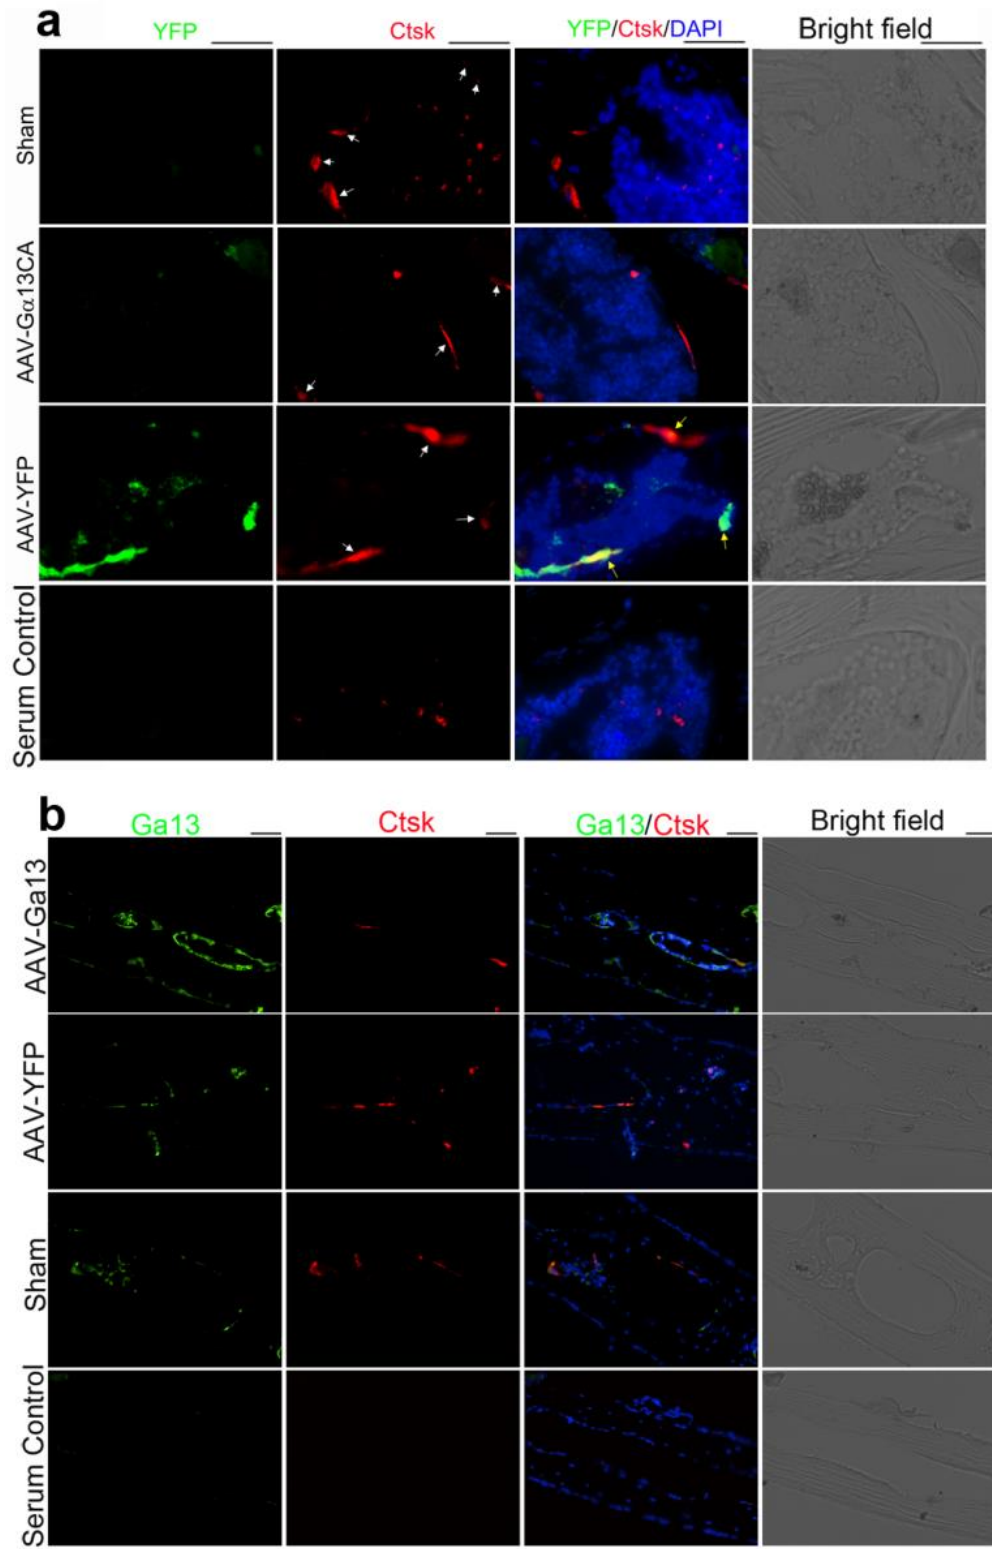

Supplementary Figure 9. Analysis of the effective infection of AAV in the 2-month female mouse calvarial bone in the ovariectomized (OVX) model. (a) Co-immunofluorescent staining using anti-YFP and anti-Ctsk antibody using frozen sections of calvarial bones. (b) Co-immunofluorescent staining using anti-Gα13 and anti-Ctsk antibody of calvarial bones. Scale bars, 100μm.

Uncropped gels and blots

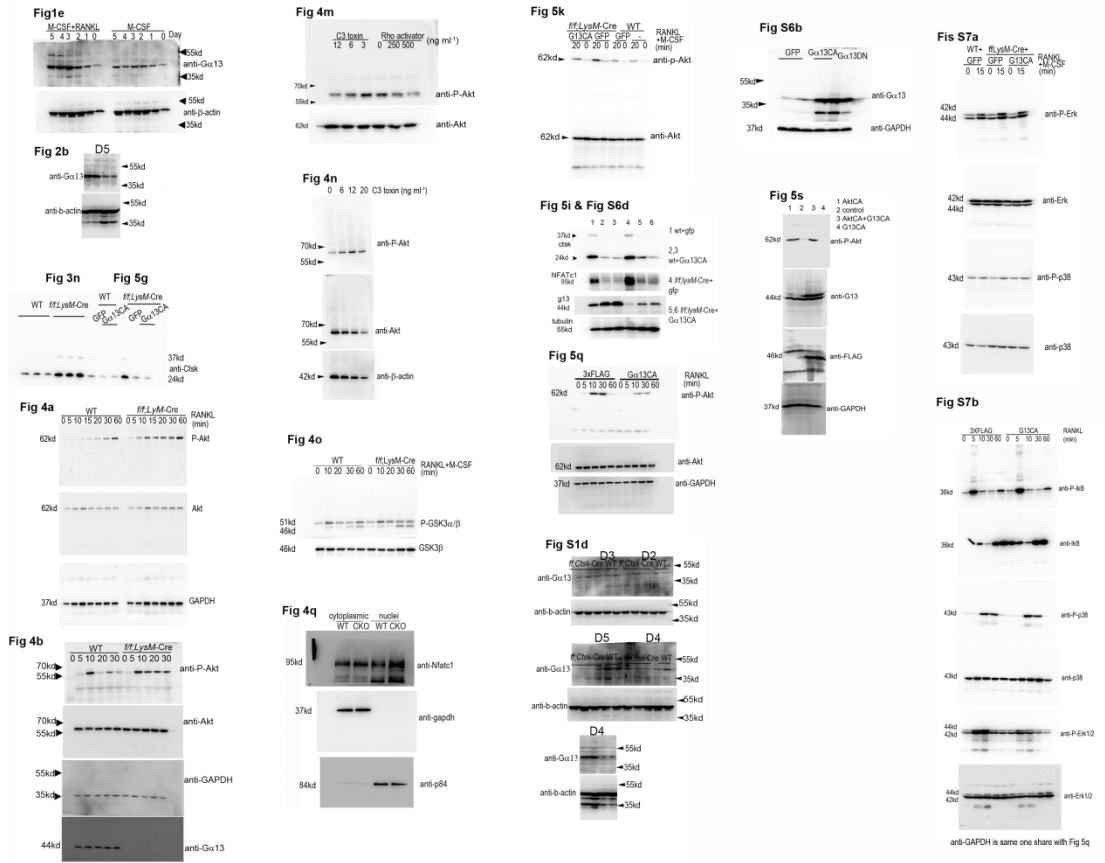

Supplementary Figure 10. Uncropped images for western blots
